# Supplementary material for: Efficient Color Tuning of Upconversion Luminescence from Core-Shell Oxysulfide Nanoparticles
Source: Hindawi journal article supplement (doi:10.1155/2019/7152690), 2019-10-07
Supplement: f1 [file 7152690.f1.docx]

Efficient Color Tuning of Upconversion Luminescence from Core-shell Oxysulfide Nanoparticles

**Ying Tian, Jianxin Jiao, Feng Xin, Mingming Xing*, Yong Peng, Xixian Luo***

1 School of Science, Dalian Maritime University, Dalian, Liaoning, 116026, PR.China

E-mail: [xingmingming@dlmu.edu.cn](mailto:xingmingming@dlmu.edu.cn), [luoxx@dlmu.edu.cn](mailto:luoxx@dlmu.edu.cn)

**Supporting information**

1. The experiments on the optimum RE-ions doping concentrations.

Before synthesizing the core-shell Y2O2S:Er3+@Y2O2S:Yb3+,Ho3+ nanoparticles, we have carefully conducted a series of Yb3+ and Er3+ ions co-doped Y2O2S bulk samples to find out the optimum RE-ions doping conditions. As shown in the Fig.1a, firstly, the Yb3+ doping concentration of Y2O2S: Yb3+, Er3+ was fixed at 5%, and changing the Er3+ doping concentration from 1% to 16%, the optimum Er3+ concentration was found to be 12% that present the highest integrated emission intensity under the excitation of 980 nm. Then, by fixing the Er3+ concentration at 2%, and changing the Yb3+ doping concentration from 1% to 16%, the optimum concentration of Yb3+ was found to be 8% (Fig.1b). Therefore, the optimum concentrations of Yb3+ and Er3+ ions (8% and 12%) found in the above preparation work were chosen in the preparation of core-shell structure. Due to the low quenching concentration of Ho3+ ions, the doping concentration of 1% is selected in the present work.

Y2O2S:Er3+@Y2O2S:Yb3+,Ho3+, is successfully synthesized and new luminescence properties and energy transfer channels are found in this unique core-shell structure. Further full studies of the core-shell rare earth oxysulfide with different doping ions and concentrations are under way and will be summarized in an independent publication.


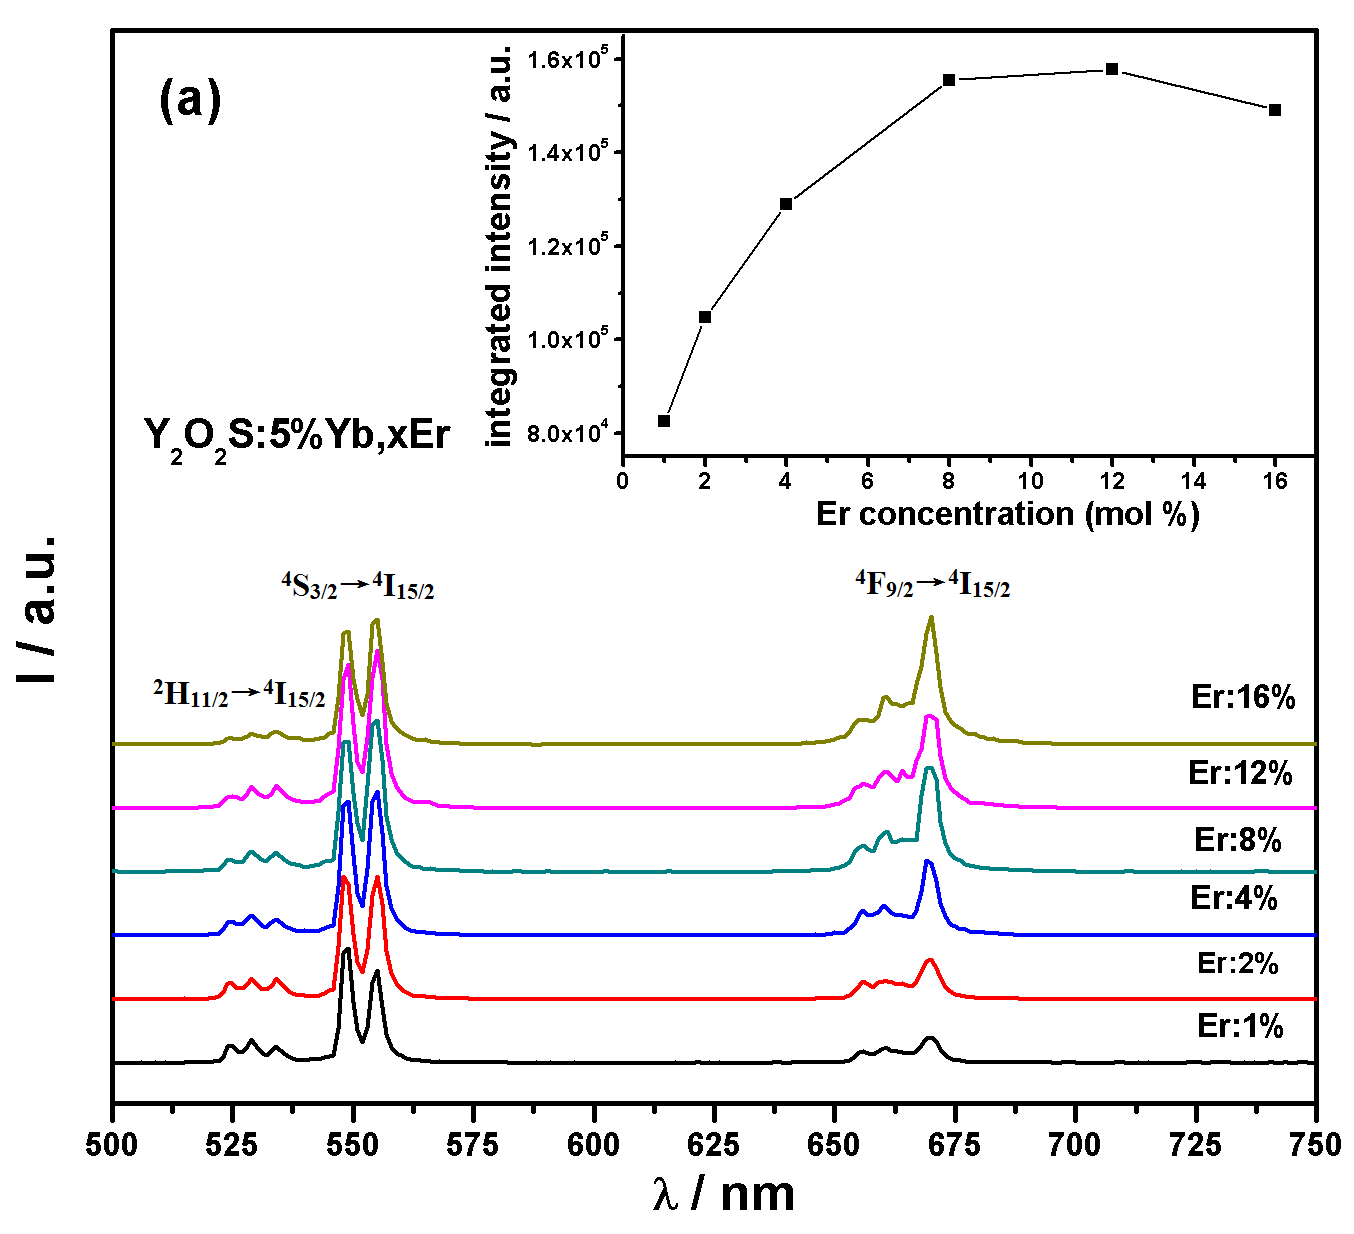


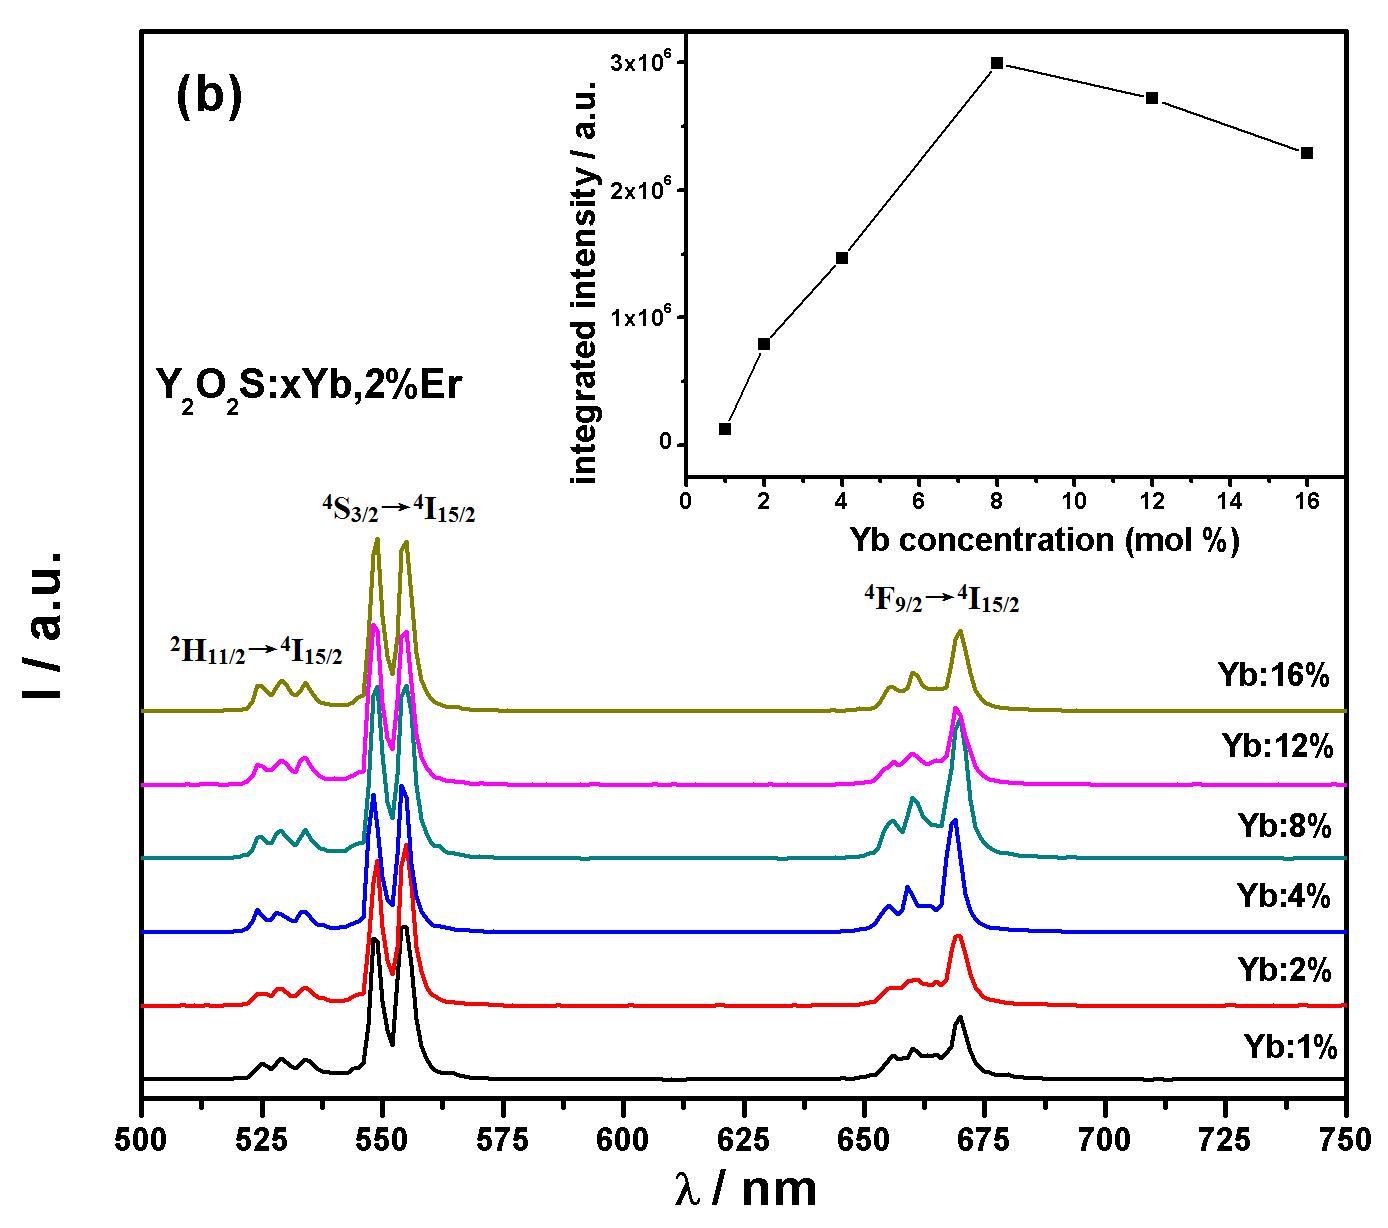


**Figure 1.** UC spectra of Y2O2S:Yb:Er bulk samples with different Yb3+, Er3+ ions doping concentrations excited by 980 nm (a) Yb % = 5 %, Er % = 1-16 %; (b) Er % = 2 %, Yb % = 1-16 %.

1. Particle size distributions of the precursor of the core and the core-shell samples.


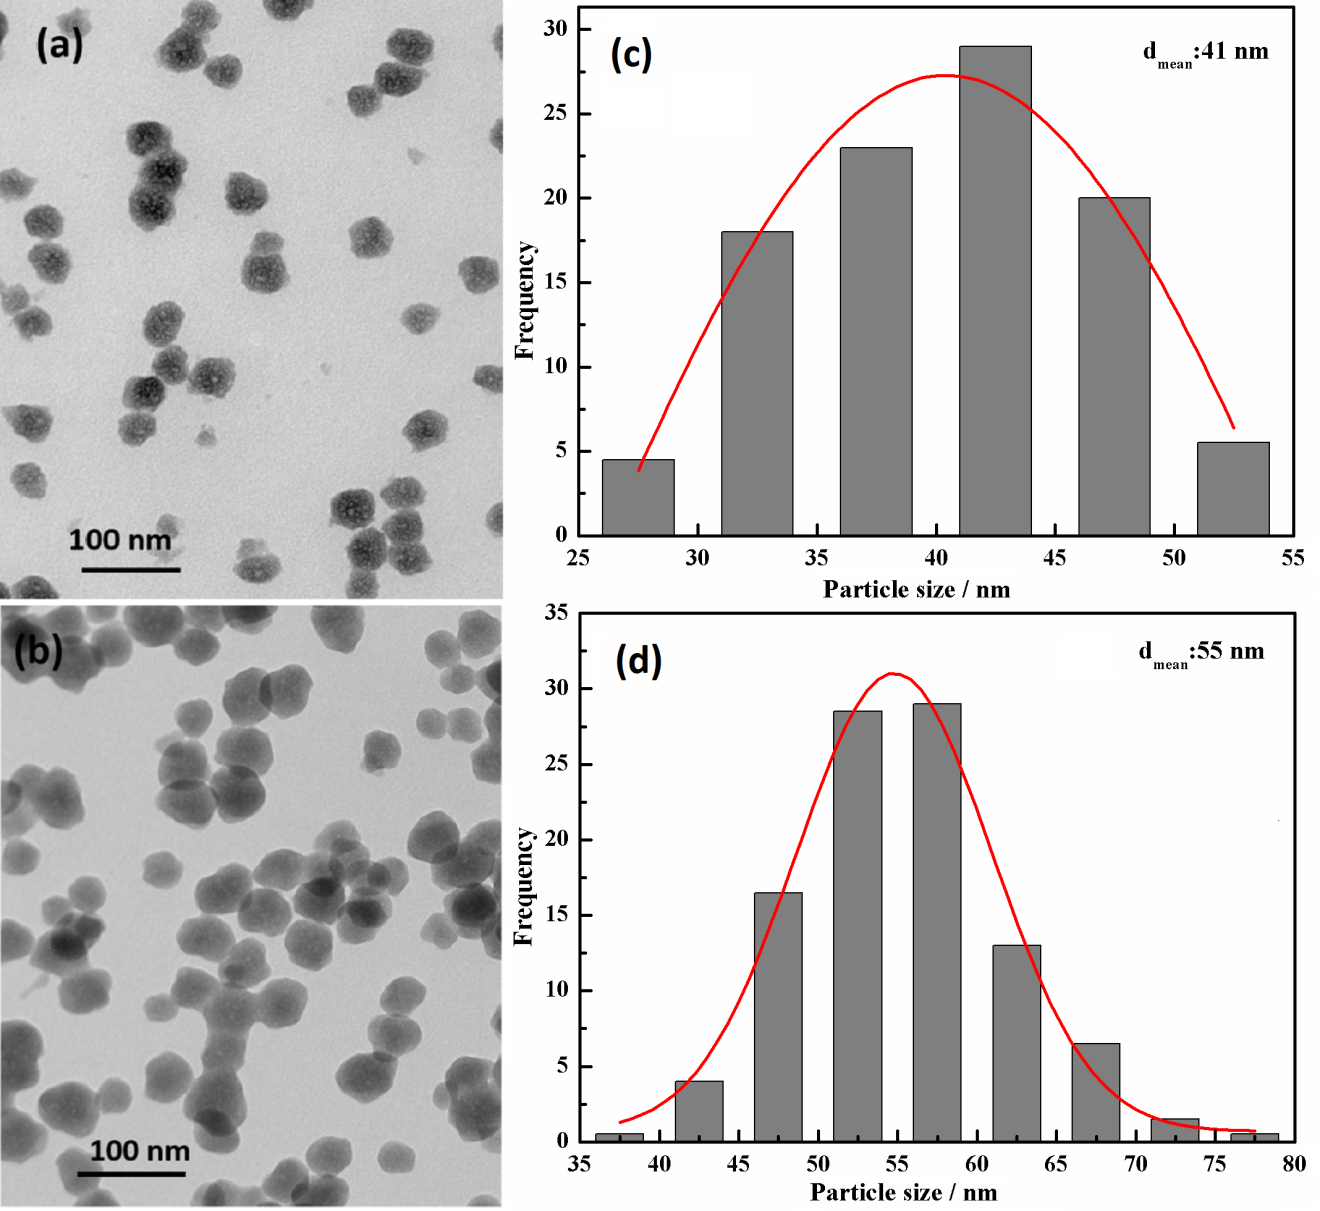


**Figure. 2** TEM images and corresponding particle size histograms of (a) (c) Y(OH)CO3:Er3+ and (b) (d) Y2O3:Er3+@ Y(OH)CO3:Yb3+,Ho3+ samples.

***
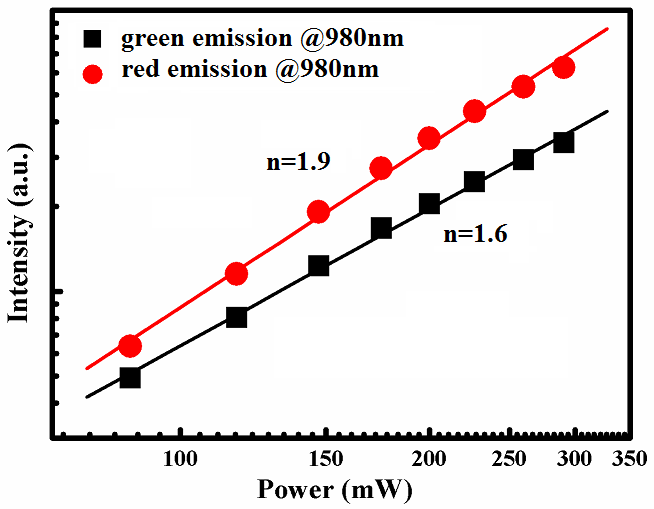
***

**Figure S3.** Intensity of red and green emissions of Y2O2S: Er3+ @ Y2O2S: Yb3+, Ho3+ sample as a function of pump power under excitation of 980 nm.

The luminescence intensity of the UCL material is proportional to the excitation power. Figure S3 is the logarithmic curve of UCL intensity as a function of excitation power for the sample of Y2O2S: Er3+ @ Y2O2S @ Y2O2S: Yb3+ at 980 nm excitation. By fitting the experimental datas, the slopes of green and red emissions are 1.6 and 1.8, respectively. This result shows that the UCL is a two-photon process.
